# Supplementary material
Source: publisher figshare collection journal article supplement (https://tandf.figshare.com/ndownloader/files/17676251)
Supplement: Supplementary file 1 [file 17676251]

Supplemental Table 1: ICD-9-CM and -10-CM codes queried for inclusion in retrospective chart review.

| **ICD-9-CM Cannabis Codes** | |
| --- | --- |
| **Code** | **Meaning** |
| 305.2 | Marijuana/cannabis abuse, nondependent |
| 305.20-305.23 | Marijuana/cannabis abuse, (unspecified, continuous, episodic, in remission) |
| 304.3 | Marijuana/cannabis dependence |
| 304.31 | Marijuana/cannabis dependence, unspecified |
| 304.32 | Marijuana/cannabis dependence episodic |
| 304.33 | Marijuana/cannabis dependence in remission |
| T40.7 | Poisoning by cannabis |
| **ICD-10-CM Cannabis Codes** | |
| **Code** | **Meaning** |
| F12 | Cannabis related disorders |
| F12.1 | Cannabis abuse |
| F12.10 | Cannabis uncomplicated |
| F12.12 | Cannabis abuse with intoxication |
| F12.120 | Cannabis uncomplicated |
| F12.121 | Cannabis delirium |
| F12.122 | Cannabis with perceptual disturbance |
| F12.129 | Cannabis abuse unspecified |
| F12.15 | Cannabis abuse with psychotic disorder |
| F12.150 | Cannabis abuse with delusions |
| F12.151 | Cannabis abuse with hallucinations |
| F12.159 | Cannabis abuse unspecified |
| F12.18 | Cannabis abuse with other cannabis-induced disorder |
| F12.180 | Cannabis abuse with cannabis-induced anxiety disorder |
| F12.188 | Cannabis abuse with other cannabis-induced disorder |
| F12.19 | Cannabis abuse with unspecified cannabis-induced disorder |
| F12.2 | Cannabis dependence |
| F12.20 | Cannabis dependence uncomplicated |
| F12.21 | Cannabis dependence in remission |
| F12.22 | Cannabis dependence with intoxication |
| F12.220 | Cannabis dependence uncomplicated |
| F12.221 | Cannabis dependence with delirium |
| F12.222 | Cannabis dependence with perceptual disturbance |
| F12.229 | Cannabis dependence unspecified |
| F12.25 | Cannabis dependence with psychotic disorder |
| F12.250 | Cannabis dependence with delusions |
| F12.251 | Cannabis dependence with hallucinations |
| F12.259 | Cannabis dependence unspecified |
| F12.28 | Cannabis dependence with other cannabis-induced disorder |
| F12.280 | Cannabis dependence with cannabis-induced anxiety disorder |
| F12.288 | Cannabis dependence with other cannabis-induced disorder |
| F12.29 | Cannabis dependence with unspecified cannabis-induced disorder |
| F12.9 | Cannabis use, unspecified |
| F12.90 | Cannabis use uncomplicated |
| F12.92 | Cannabis use, unspecified with intoxication |
| F12.920 | Cannabis use uncomplicated |
| F12.921 | Cannabis use with delirium |
| F12.922 | Cannabis use with perceptual disturbance |
| F12.929 | Cannabis use unspecified |
| F12.922 | Cannabis use with perceptual disturbance |
| F12.929 | Cannabis use unspecified |
| F12.95 | Cannabis use, unspecified with psychotic disorder |
| F12.950 | Cannabis use with delusions |
| F12.951 | Cannabis use with hallucinations |
| F12.959 | Cannabis use, unspecified |
| F12.98 | Cannabis use, unspecified with other cannabis-induced disorder |
| F12.980 | Cannabis use, unspecified with anxiety disorder |
| F12.988 | Cannabis use, unspecified with other cannabis-induced disorder |
| F12.99 | Cannabis with unspecified cannabis-induced disorder |
| T40.7 | Poisoning by, adverse effect of and underdosing of cannabis (derivatives) |
| T40.7X | Poisoning by, adverse effect of and underdosing cannabis (derivatives) |
| T40.7X1(A,D,S) | Poisoning by cannabis (derivatives), accidental (unintentional)(Initial, subsequent, sequela) |
| T40.7X2 | Poisoning by cannabis (derivatives), intentional self-harm |
| T40.7X2A | Initial encounter |
| T40.7X2D | Subsequent encounter |
| T40.7X2S | Sequela |
| T40.7X3 | Poisoning by cannabis (derivatives), assault |
| T40.7X3A | Initial encounter |
| T40.7X3D | Subsequent encounter |
| T40.7X3S | Sequela |
| T40.7X4 (A, D, S) | Poisoning by cannabis, undetermined |
| T40.7X5 | Adverse effect of cannabis (derivatives) |

Supplemental Table 2: Information extracted from the patient’s medical record for each ED visit.

| **Criterion:** |
| --- |
| Patient state |
| Sex |
| Race |
| Ethnicity |
| Insurance type |
| Number of ED visits in the year before the referenced ED visit |
| Disposition from the ED |
| Presenting chief complaint |
| Primary discharge diagnosis |
| Discharge date and time from the ED |
| If admitted, discharge date and time from the hospital |
| Discharge ICD-9-CM or -10-CM code |
| Urine toxicology screen |
| Alcohol use coincident with index ED visit |
| Urine pregnancy test of mention of current pregnancy in chart |
| ED length of stay |
| If admitted, hospital length of stay |
